# Supplementary material for: Comparing computer-generated and pathologist-generated tumour segmentations for immunohistochemical scoring of breast tissue microarrays
Source: PubMed Central journal article supplement (PMC4651129; doi:10.1038/bjc.2015.309), 2015-09-08
Supplement: bjc2015309x2.pdf [file bjc2015309x2.pdf]

```

1 %Journal: Breast Cancer Research and Treatment
2 %Title: Computer-Generated Scoring Compared With Specialist
      Pathologist Scoring for Estrogen Receptor in Tissue Microarrays
3 %Authors: Shazia Akbar, Lee B. Jordan, Colin A. Purdie, Alastair M.
      Thompson, Stephen J. McKenna
4 %Corresponding author: Stephen J. McKenna. email: S.J.Z.
      McKenna@dundee.ac.uk
5 %
6 %This Matlab code identifies Type 1 (T1), Type 2 (T2) and Type 3 (T3)
7 %disagreements between S_a and S_b which are both binary (i.e.
      logical)
8 %images. Disagreements are returned in binary format as well.
9 function [ T1, T2, T3 ] = FindDisagreementTypes( S_a, S_b )
10
11 D_fp = S_a & ~S_b;
12 D_fn = ~S_a & S_b;
13
14 %define structuring element
15 e = strel('disk', 10);
16 %perform morphological opening on D_fn and D_fp
17 O_fp = imopen(D_fp, e);
18 O_fn = imopen(D_fn, e);
19
20 T1 = (D_fp - O_fp) | (D_fn - O_fn);
21
22 T2 = FindConnectivity(O_fp, S_b) | FindConnectivity(O_fn, S_a);
23 T3 = (O_fp | O_fn) - T2;
24
25 end
26
27 %Find regions in O connected to regions in S
28 function [t2] = FindConnectivity(O, S)
29
30     t2 = zeros(size(S));
31     [~, L] = bwboundaries(O, 'noholes'); %perform CCA
32
33     for idx = 1:max(max(L))
34         %find outline of region by dilation
35         outline = imdilate(L==idx, strel('disk',1));
36         %if outline intersects with S then connected
37         if(sum(S(outline)))

```

```
38         t2(L==idx) = 1;
39     end
40 end
41
42 end
```
